# Supplementary material
Source: PubMed Central journal article supplement (PMC6496100)
Supplement: AAC.02410-18datasupplement.pdf [file AAC.02410-18datasupplement.pdf]

## Supplemental Material

Supp. Material 1. General Chemical Methods for Benzamidobenzoic Acid Compounds

## Supplemental Figures

Supp. Fig. 1. Characterization of cyst-like structures after growth of amoeba under different culture conditions. (A.) Trophozoites were cultured in standard NCM (Glc), NCM with no glucose but supplemented with 9 mM mannose (Man), NCM without glucose (-Glc), or in NCM with 50 mM 3-bromopyruvate (3BP). Images are before (left) and after (right) addition of 0.25% SDS. (B.) Trophozoite recovered from cysts generated by culture in NCM with no glucose supplemented by mannose. Scale bar = 20  $\mu\text{m}$ .

## Supplemental Data Files

Supp. Data 1. Alignment of HKs and Glcks. HKs and Glcks with resolved structures were aligned using T-Coffee (version 11.00.d625267 (2016-01-11 15:25:41 – Revision d625267 – Build 507), which uses structural information to inform the alignment. The yellow highlights denote residues that interact with glucose in the binding pocket based on PDB site. The first 4 characters are the PDB ID. HsGCK, human glucokinase; KHK; *K. lactis* hexokinase, SchK P1, yeast hexokinase P1, TcGlcK, *T. cruzi* glucokinase, NfGlcK, *N. fowleri* glucokinase. The “\*” indicated in the consensus line (cons) are fully conserved residues, the “:” indicates highly similar residue conservation, and “.” indicates weak conservation.

## Supplemental Material 1

### Enzymatic and structural characterization of the *Naegleria fowleri* glucokinase

Jillian E. Milanes<sup>1</sup>, Jimmy Suryadi<sup>1</sup>, Jan Abendroth<sup>2</sup>, Wes Van Voorhis<sup>3</sup>, Kayleigh F. Barrett<sup>3</sup>, David Dranow<sup>2</sup>, Isabelle Phan<sup>4</sup>, Stephen L. Patrick<sup>1</sup>, Soren D. Rozema<sup>5</sup>, Muhammad M. Khalifa<sup>5</sup>, Jennifer E. Golden<sup>5</sup>, and James C. Morris<sup>1#</sup>

<sup>1</sup>Eukaryotic Pathogens Innovation Center, Department of Genetics and Biochemistry, Clemson University, Clemson, SC 29634

<sup>2</sup>CrystalCore, Beryllium Discovery, Bainbridge Island, WA 98110

<sup>3</sup>Center for Emerging and Re-emerging Infectious Diseases, University of Washington, Seattle, WA 98109

<sup>4</sup>Seattle Structural Genomics Center for Infectious Disease, Center for Infection Disease Research, Seattle BioMed, Seattle, WA 98109

<sup>5</sup>School of Pharmacy, Pharmaceutical Sciences Division, University of Wisconsin-Madison, Madison, WI 53705

#### Table of Contents

|                                                    |                |
|----------------------------------------------------|----------------|
| Title, authors, affiliations and table of contents | Page S1        |
| General chemical methods                           | Page S2        |
| Scheme S1                                          | Page S2        |
| Compound characterization                          | Pages S3 – S13 |
| Scheme S2                                          | Page S5        |
| References                                         | Page S13       |

## General Chemical Methods for Benamidobenzoic Acid Compounds (Golden group, University of Wisconsin-Madison)

Compounds not described below were purchased from commercial vendors. Purity of all final compounds was confirmed by HPLC/MS analysis and determined to be  $\geq 95\%$ .  $^1\text{H}$  and  $^{13}\text{C}$  NMR spectra were recorded on a Varian Unity-Inova 400 MHz NMR Spectrometer (operating at 400 and 101 MHz, respectively) or a Varian Unity-Inova 500 MHz NMR Spectrometer (operating at 500 and 126 MHz, respectively) or Bruker Ascend 400 MHz Spectrometer (operating at 400 and 101 MHz, respectively) in  $\text{CDCl}_3$  (residual internal standard  $\text{CHCl}_3 = \delta 7.26$ ),  $\text{DMSO-d}_6$  (residual internal standard  $\text{CD}_3\text{SOCD}_2\text{H} = \delta 2.50$ ),  $\text{CD}_3\text{OD}$  (residual internal standard  $\text{CD}_3\text{OH} = \delta 3.31$ ), or acetone- $\text{d}_6$  (residual internal standard  $\text{CD}_3\text{COCD}_2\text{H} = \delta 2.05$ ). The chemical shifts ( $\delta$ ) reported are given in parts per million (ppm), and the coupling constants ( $J$ ) are in hertz (Hz). The spin multiplicities are reported as s = singlet, brs = broad singlet, d = doublet, t = triplet, q = quartet, p = pentuplet, dd = doublet of doublet, dt = doublet of triplet, td = triplet of doublet, tt = triplet of triplet, and m = multiplet. Flash chromatography separations were carried out using a Teledyne Isco CombiFlash Rf 200 purification system with silica gel columns. The LC-MS analysis was performed on an Agilent 1290 Infinity II HPLC system with 1290 Infinity II Diode Array Detector and an Agilent 6120 Quadrupole LC-MS system. The analytical chromatography method utilized the following parameters: Poroshell 120 EC-C18, 1.9  $\mu\text{m}$  column, UV detection wavelength = 254 nm, Flow rate = 1.0 mL/min, Gradient = 5-100% LC-MS grade Methanol over 4 min; The organic mobile phase and aqueous mobile phase contained 0.1% LC-MS grade formic acid. The mass spectrometer utilized the following parameters: an Agilent multimode source that simultaneously acquires ESI+/APCI+; Final compounds were determined to be  $\geq 95\%$  purity by UV-LCMS at 254 nm.

The syntheses and characterization of several benamidobenzoic acid compounds listed herein have been previously described. Specifically, SID144241589 (ML205, entry 5, Table 1) is described in a probe report on the NIH bookshelf.<sup>1</sup> SID162211071, SID162211077, SID144241590, SID162211078, SID162211083, SID162211084, SID162211075, SID162211076, SID162211086, and SID162211072 (entries 6-11, 14-15, and 18-19, Table 1) have been previously reported.<sup>2</sup> Characterization of resynthesized compounds matched previous reports. In some cases, compounds were prepared by modified methods, which are described below. New compounds are also described.

### Scheme 1. General synthetic approach to benamidobenzoic acids

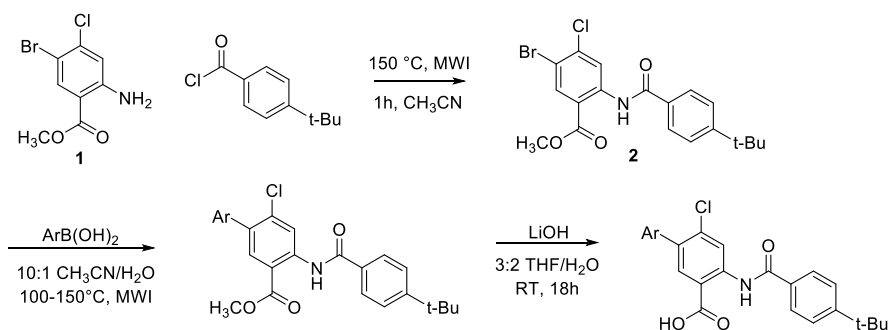

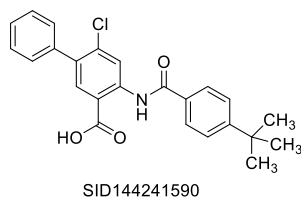

**4-(4-(*t*-butyl)benzamido)-6-chloro-[1,1'-biphenyl]-3-carboxylic acid, SID144241590, entry 8, Table 1.**  
Prepared according to Scheme 1.

*Step 1:* To a G30 microwave vial was added CH<sub>3</sub>CN (10.0 mL), methyl 2-amino-4-chloro-5-bromobenzoate (2.0 g, 7.6 mmol, 1 equiv.), and 4-*t*-butylbenzoyl chloride (1.6 mL, 8.3 mmol, 1.1 equiv.). The reaction was sealed and heated at 150 °C by microwave irradiation for 1h with stirring and then allowed to cool to rt. The resulting precipitate was filtered to collect the desired product **2** as an oatmeal-colored solid (1.6 g, 3.8 mmol, 50% yield). <sup>1</sup>H NMR (400 MHz, CDCl<sub>3</sub>): δ=11.94 (br s, 1H), 9.20 (s, 1H), 8.29 (s, 1H), 7.95 (d, *J*=8.8 Hz, 2H), 7.55 (d, *J*=8.8 Hz, 2H), 3.98 (s, 3H), 1.36 (s, 9H).

*Step 2:* To a G4 microwave vial was added **2** (53.3 mg, 0.125 mmol, 1 equiv.), phenylboronic acid (18.3 mg, 0.15 mmol, 1.2 equiv.), bis(triphenylphosphine)palladium dichloride (6.3 mg, 0.01 mmol, 0.07 equiv.), and Na<sub>2</sub>CO<sub>3</sub> (18.0 mg, 0.17 mmol, 1.4 equiv.) before addition of a 10:1 (v/v) CH<sub>3</sub>CN/H<sub>2</sub>O solution (1.0 mL). The mixture was heated at 100 °C by microwave irradiation for 30 min with stirring and then allowed to cool to rt. The reaction mixture was diluted with CH<sub>2</sub>Cl<sub>2</sub> (15 mL) and washed with H<sub>2</sub>O (3 x 10 mL) and brine (10 mL). The separated organic layer was then dried over MgSO<sub>4</sub>, filtered, and concentrated to give a yellow oil. The yellow oil was adsorbed to silica and purified by 4 g silica column MPLC (0-25% CH<sub>2</sub>Cl<sub>2</sub>/hexanes linear gradient over 15 min). The fractions eluting from 10.5-14.5 min were combined and concentrated to give the desired product methyl 4-(4-(*tert*-butyl)benzamido)-6-chloro-[1,1'-biphenyl]-3-carboxylate as a white solid (15.9 mg, 0.04 mmol, 30% yield). <sup>1</sup>H NMR (400 MHz, CDCl<sub>3</sub>): δ=12.02 (br s, 1H), 9.19 (d, *J*=0.3 Hz, 1H), 9.07 (d, *J*=0.4 Hz, 1H), 8.00 (d, *J*=8.8 Hz, 2H), 7.75 (d, *J*=8.8 Hz, 2H), 7.46-7.37 (m, 5H), 3.96 (s, 3H), 1.37 (s, 9H).

*Step 3:* To a 20 mL screwtop vial was added THF (0.4 mL) and methyl 4-(4-(*tert*-butyl)benzamido)-6-chloro-[1,1'-biphenyl]-3-carboxylate (15.9 mg, 0.04 mmol, 1 equiv.), the suspension was stirred until a solution was achieved. To this was added a 1.3 M aqueous solution of LiOH (0.2 mL, 7 equiv.), and the resulting mixture was stirred at rt for 18h. The reaction mixture was acidified with 1 M HCl (aq.) to pH 2, this was filtered to collect **SID144241590** (7.5 mg, 0.02 mmol, 49% yield) as a white solid. <sup>1</sup>H NMR (400 MHz, CDCl<sub>3</sub>): δ=11.82 (br s, 1H), 9.22 (s, 1H), 8.15 (s, 1H), 7.97 (d, *J*=8.5 Hz, 2H), 7.55 (d, *J*=8.4 Hz, 2H), 7.49-7.39 (m, 5H), 1.37 (s, 9H). <sup>13</sup>C NMR (126 MHz, CDCl<sub>3</sub>): δ=165.9, 156.2, 142.1, 140.5, 138.2, 135.2, 134.1, 131.6, 129.6, 128.4, 128.1, 127.4, 126.1, 121.8, 112.5, 110.1, 35.2, 31.3. HPLC *t*<sub>R</sub> = 6.84 min; purity >98%.

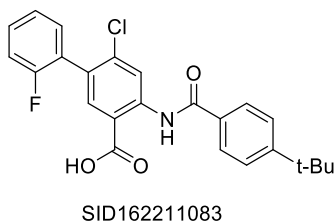

**4-(4-(*tert*-butyl)benzamido)-6-chloro-2'-fluoro-[1,1'-biphenyl]-3-carboxylic acid. SID144241590, entry 10, Table 1.** Prepared according to Scheme 1.

To a G10 microwave vial was added aryl bromide **2** (100 mg, 0.235 mmol, 1 equiv.), 2-fluorophenylboronic acid (39.6 mg, 0.283 mmol, 1.2 equiv.), bis(triphenylphosphine)palladium dichloride (16.5 mg, 0.024 mmol, 0.10 equiv.) and Na<sub>2</sub>CO<sub>3</sub> (37.4 mg, 0.353 mmol, 1.5 equiv.) before addition of a 10:1 (v/v) CH<sub>3</sub>CN/H<sub>2</sub>O solution (2.0 mL). The mixture was heated at 150 °C by microwave irradiation for 20 min with stirring and then allowed to cool to rt. The mixture was diluted with EtOAc (10 mL) and washed with H<sub>2</sub>O (2x10 mL) and brine (2x10 mL). The separated organic layer was dried over MgSO<sub>4</sub>, filtered, and the solvent was removed under reduced pressure to give a brown oil. The oil was adsorbed to silica and purified via 4 g silica column MPLC (0-5% EtOAc/hexanes linear gradient over 15 min) to give methyl 4-(4-(*tert*-butyl)benzamido)-6-chloro-2'-fluoro-[1,1'-biphenyl]-3-carboxylate as a white solid (72.4 mg, 0.165 mmol, 58% yield). Characterization matched previous literature report.<sup>2</sup>

Methyl 4-(4-(*tert*-butyl)benzamido)-6-chloro-2'-fluoro-[1,1'-biphenyl]-3-carboxylate was subjected to the same conditions as described in *Step 3* (above) to afford **SID144241590** as a white solid (44.9 mg, 0.105 mmol, 64% yield). <sup>1</sup>H NMR (400 MHz, (CD<sub>3</sub>)<sub>2</sub>CO) δ=12.33 (s, 1H), 9.23 (s, 1H), 8.16 (s, 1H), 8.00 (d, *J*=8.5 Hz, 2H), 7.65 (d, *J*= 8.5 Hz, 2H), 7.53 (tdd, *J*=7.5 Hz, 5.2 Hz, 1.8 Hz, 1H), 7.46 (td, *J*=7.6 Hz, 1.8 Hz, 1H), 7.34 (t, *J*=1.75 Hz, 1H), 7.28 (t, *J*=9.2 Hz, 1H), 1.38 (s, 9H). <sup>13</sup>C NMR (101 MHz, (CD<sub>3</sub>)<sub>2</sub>CO) δ= 166.0 (d, *J*=8.1 Hz), 160.6 (d, *J*=245.8 Hz), 156.8, 143.6 (d *J*=14.8 Hz), 140.3, 135.1, 132.7, 132.6, 132.6, 131.5 (d *J*=8.2 Hz), 129.7, 128.1, 126.8, 126.2, 125.3, (d, *J*=3.6 Hz), 121.1 (d, *J*=5.3 Hz), 116.6, 116.3, 35.6, 31.4. HPLC RT = 6.85 min; purity >98%.

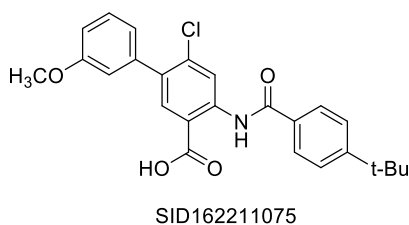

**4-(4-(*tert*-butyl)benzamido)-6-chloro-3'-methoxy-[1,1'-biphenyl]-3-carboxylic acid. SID162211075, entry 14, Table 1.** Prepared according to Scheme 1.

To a G10 microwave vial was added aryl bromide **2** (100 mg, 0.235 mmol, 1 equiv.), 3-methoxyphenylboronic acid (43.0 mg, 0.283 mmol, 1.2 equiv.), bis(triphenylphosphine)palladium dichloride (16.5 mg, 0.024 mmol, 0.10 equiv.) and Na<sub>2</sub>CO<sub>3</sub> (37.4 mg, 0.353 mmol, 1.5 equiv.) before addition of a 10:1 (v/v) CH<sub>3</sub>CN/H<sub>2</sub>O solution (2.0 mL). The mixture was heated at 150 °C by microwave irradiation for 30 min with stirring and then allowed to cool to rt. The mixture was diluted with EtOAc (10 mL) and washed with H<sub>2</sub>O (2x10 mL) and brine (2x10 mL). The separated organic layer was dried over MgSO<sub>4</sub>, filtered, and the solvent was removed under reduced pressure to give a brown oil. The oil was adsorbed to silica and purified via 4 g silica column MPLC (0-5% EtOAc/hexanes linear gradient over 15 min) to give methyl 4-(4-(*t*-butyl)benzamido)-6-chloro-3'-methoxy-[1,1'-biphenyl]-3-carboxylate as a white solid (83.1 mg, 0.184 mmol, 78% yield). Characterization matched previous literature report.<sup>2</sup>

Methyl 4-(4-(*t*-butyl)benzamido)-6-chloro-3'-methoxy-[1,1'-biphenyl]-3-carboxylate was subjected to the same conditions as described in *Step 3* (above) to afford **SID162211075** as a white solid (41.7 mg, 0.095 mmol, 52% yield). <sup>1</sup>H NMR (400 MHz, Methanol-d<sub>4</sub>) δ=9.03 (s, 1H), 8.08 (s, 1H), 7.95 (d, *J*=8.5 Hz, 2H), 7.59 (d, *J*=8.6 Hz, 2H), 7.35 (m, 1H), 6.98 (m, 3H), 3.84 (s, 3H), 1.37 (s, 9H). <sup>13</sup>C NMR (101 MHz, Methanol-d<sub>4</sub>) δ=171.0, 167.4, 160.9, 157.4, 142.5, 140.9, 139.3, 136.2, 134.9, 132.7, 130.4, 128.3, 127.0, 122.8, 122.1, 116.2, 114.5, 55.8, 49.6, 49.4, 49.2, 49.0, 48.8, 48.6, 48.4, 35.9, 31.5. HPLC RT = 6.93 min. HPLC Purity >98%.

## Scheme 2. Alternative procedure for synthesis of benzamidobenzoic acids

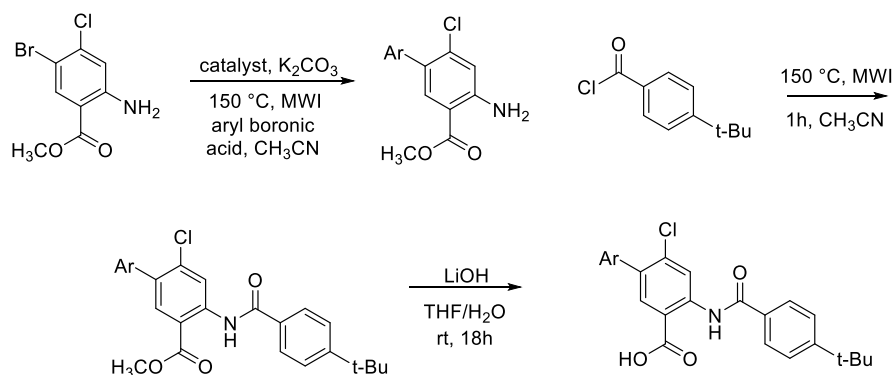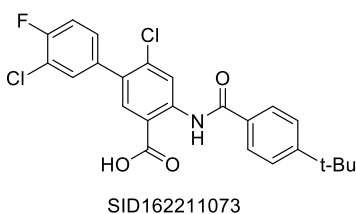

**4-(4-(*t*-butyl)benzamido)-3',6-dichloro-4'-fluoro-[1,1'-biphenyl]-3-carboxylic acid. SID162211073, entry 12, Table 1.** Prepared according to Scheme 2.

**Step 1. Methyl 4-amino-3',6-dichloro-4'-fluoro-[1,1'-biphenyl]-3-carboxylate.** To a microwave vial was added 3-chloro-4-fluorophenyl)boronic acid (0.078 g, 0.45 mmol), methyl 2-amino-5-bromo-4-chlorobenzoate **2** (0.098 g, 0.37 mmol), 1,1'-bis(di-*t*-butylphosphino)ferrocene palladium dichloride, (5.0 mg, 7.4  $\mu$ mol) and K<sub>2</sub>CO<sub>3</sub> (0.077 g, 0.56 mmol). The vial was evacuated with argon 3 times, and then degassed CH<sub>3</sub>CN (1.5 mL) and water (1.5 mL) were added. The reaction stirred at 110 °C for 60 minutes in the microwave. After cooling to rt, the reaction was diluted with EtOAc (10 mL) and washed with saturated NaHCO<sub>3</sub> (12 mL). The separated organic extracts were dried with MgSO<sub>4</sub>, filtered and concentrated. The crude product was purified by reverse-phase MPLC (10 - 100% CH<sub>3</sub>CN:H<sub>2</sub>O) to provide pure methyl 4-amino-3',6-dichloro-4'-fluoro-[1,1'-biphenyl]-3-carboxylate (0.038 g, 0.12 mmol, 32% yield). <sup>1</sup>H NMR (400 MHz, CDCl<sub>3</sub>)  $\delta$  7.80 (s, 1H), 7.43 (dd,  $J_1 = 7.0$  Hz,  $J_2 = 2.2$  Hz, 1H), 7.29 – 7.24 (m, 1H), 7.16 (t,  $J = 8.6$  Hz, 1H), 6.81 (s, 1H), 3.87 (s, 3H).

**Step 2. Methyl 4-(4-(*t*-butyl)benzamido)-3',6-dichloro-4'-fluoro-[1,1'-biphenyl]-3-carboxylate.** To a microwave vial was added methyl 4-amino-3',6-dichloro-4'-fluoro-[1,1'-biphenyl]-3-carboxylate (0.038 g, 0.12 mmol), acetonitrile (2 mL) and 4-(*t*-butyl)benzoyl chloride (0.026 g, 0.024 mL, 0.13 mmol). The reaction was stirred at 150 °C in the microwave for 60 min. After cooling to rt, the reaction was diluted with saturated NaHCO<sub>3</sub> (10 mL) and extracted with EtOAc (2 x 10 mL). The separated organic layers were combined and dried with MgSO<sub>4</sub>, filtered and adsorbed to silica Purification by MPLC (0 - 15% EtOAc:hexanes) afforded methyl 4-(4-(*t*-butyl)benzamido)-3',6-dichloro-4'-fluoro-[1,1'-biphenyl]-3-carboxylate (0.037 g, 0.078 mmol, 64% yield). <sup>1</sup>H NMR (400 MHz, CDCl<sub>3</sub>)  $\delta$  12.03 (s, 1H), 9.20 (s, 1H), 8.02 (s, 1H), 8.00 (d,  $J = 8.5$  Hz, 2H), 7.57 (d,  $J = 8.5$  Hz, 2H), 7.49 (dd,  $J_1 = 7.0$  Hz,  $J_2 = 2.2$  Hz, 1H), 7.35 – 7.30 (m, 1H), 7.22 (t,  $J = 8.7$  Hz, 1H), 3.98 (s, 3H), 1.37 (s, 9H).

**Step 3. 4-(4-(*t*-butyl)benzamido)-3',6-dichloro-4'-fluoro-[1,1'-biphenyl]-3-carboxylic acid.** To a flask was added methyl 4-(4-(*t*-butyl)benzamido)-3',6-dichloro-4'-fluoro-[1,1'-biphenyl]-3-carboxylate (0.037 g, 0.078 mmol), THF (1 mL), LiOH (0.013 g, 0.55 mmol) and water (1 mL). The reaction stirred for 18h at rt and was then acidified to pH 2 - 3 with aqueous 1.0 M HCl and extracted with CH<sub>2</sub>Cl<sub>2</sub> (3 x 10 mL). The organic layers were combined and then dried with MgSO<sub>4</sub>, filtered and adsorbed to silica then purified by column chromatography (0 - 5% MeOH:CH<sub>2</sub>Cl<sub>2</sub>) to afford 4-(4-(*t*-butyl)benzamido)-3',6-dichloro-4'-fluoro-[1,1'-biphenyl]-3-carboxylic acid **SID162211073** (0.030 g, 0.065 mmol, 84% yield). <sup>1</sup>H NMR (400 MHz, DMSO-*d*<sub>6</sub>)  $\delta$  12.26 (s, 1H), 8.98 (s, 1H), 8.03 (s, 1H), 8.5 Hz, 2H), 7.73 (dd,  $J_1 = 7.2$  Hz,  $J_2 = 2.2$  Hz, 1H), 7.64 (d,  $J = 8.5$  Hz, 2H), 7.57 – 7.48 (m, 2H), 1.34 (s, 9H). <sup>13</sup>C NMR (125 MHz, DMSO-*d*<sub>6</sub>)  $\delta$  169.1, 164.9, 157.0 (d,  $J = 248.0$  Hz), 155.6, 141.4, 136.8, 135.2 (d,  $J = 3.9$  Hz), 133.7, 131.7, 131.4, 131.2, 130.3 (d,  $J = 7.7$  Hz), 127.0, 126.0, 120.3, 119.4 (d,  $J = 17.8$  Hz), 116.9 (d,  $J = 21.0$  Hz), 115.7, 34.8, 30.9. LCMS RT: 4.528 min. LCMS purity 93.4%. HRMS (ESI)  $m/z$  calcd for C<sub>24</sub>H<sub>20</sub>Cl<sub>2</sub>FNO<sub>3</sub> [M+H]<sup>+</sup> 460.0876, found 460.0877.

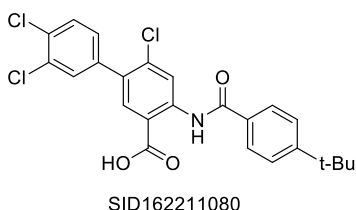

**4-(4-(*t*-butyl)benzamido)-3',4',6-trichloro-[1,1'-biphenyl]-3-carboxylic acid. SID162211080, entry 13, Table 1.** Prepared according to Scheme 2.

**Methyl 4-amino-3',4',6-trichloro-[1,1'-biphenyl]-3-carboxylate. Prepared as described above, Scheme 2, Step 1.** (3,4-dichlorophenyl)boronic acid (0.084 g, 0.44 mmol), methyl 2-amino-5-bromo-4-chlorobenzoate (0.097 g, 0.37 mmol), 1,1'-bis(di-*t*-butylphosphino)ferrocene palladium dichloride, (5.0 mg, 7.3  $\mu$ mol) and  $K_2CO_3$  (0.076 g, 0.55 mmol), degassed acetonitrile (1.5 mL) and water (1.5 mL). The crude product was purified by reverse-phase MPLC (10 - 100%  $CH_3CN:H_2O$ ) to provide methyl 4-amino-3',4',6-trichloro-[1,1'-biphenyl]-3-carboxylate (0.047 g, 0.14 mmol, 39% yield) as a white solid.  $^1H$  NMR (400 MHz,  $CDCl_3$ )  $\delta$  7.80 (s, 1H), 7.49 (d,  $J = 2.1$  Hz, 1H), 7.46 (d,  $J = 8.2$  Hz, 2H), 7.25 (dd,  $J_1 = 8.3$  Hz,  $J_2 = 2.1$  Hz, 1H), 6.80 (s, 1H), 3.87 (s, 3H).

**Methyl 4-(4-(*t*-butyl)benzamido)-3',4',6-trichloro-[1,1'-biphenyl]-3-carboxylate. Prepared as described above, Scheme 2, Step 2.** methyl 4-amino-3',4',6-trichloro-[1,1'-biphenyl]-3-carboxylate (0.047 g, 0.14 mmol), acetonitrile (2 mL) and 4-(*t*-butyl)benzoyl chloride (0.031 g, 0.028 mL, 0.16 mmol). Purified by MPLC (0 - 15% EtOAc: hexanes) to produce methyl 4-(4-(*t*-butyl)benzamido)-3',4',6-trichloro-[1,1'-biphenyl]-3-carboxylate (0.049 g, 0.10 mmol, 70% yield).  $^1H$  NMR (400 MHz,  $CDCl_3$ )  $\delta$  12.03 (br s, 1H), 9.21 (s, 1H), 8.03 (s, 1H), 7.99 (d,  $J = 8.5$  Hz, 2H), 7.59 – 7.50 (m, 4H), 7.32 (dd,  $J_1 = 8.3$  Hz,  $J_2 = 2.1$  Hz, 1H), 3.98 (s, 3H), 1.37 (s, 9H).

**4-(4-(*t*-butyl)benzamido)-3',4',6-trichloro-[1,1'-biphenyl]-3-carboxylic acid. Prepared as described above, Scheme 2, Step 3.** Methyl 4-(4-(*t*-butyl)benzamido)-3',4',6-trichloro-[1,1'-biphenyl]-3-carboxylate (0.044 g, 0.089 mmol), THF (1 mL), LiOH (0.015 g, 0.62 mmol) and water (1 mL). Purified by MPLC (0 - 5% MeOH: $CH_2Cl_2$ ) to afford 4-(4-(*t*-butyl)benzamido)-3',4',6-trichloro-[1,1'-biphenyl]-3-carboxylic acid **SID162211080** (0.038 g, 0.080 mmol, 90% yield).  $^1H$  NMR (400 MHz,  $DMSO-d_6$ )  $\delta$  12.48 (br s, 1H), 8.98 (s, 1H), 8.04 (s, 1H), 7.92 (d,  $J = 8.4$  Hz, 2H), 7.79 – 7.75 (m, 2H), 7.64 (d,  $J = 8.5$  Hz, 2H), 7.51 – 7.48 (m, 1H), 1.34 (s, 9H).  $^{13}C$  NMR (126 MHz,  $DMSO-d_6$ )  $\delta$  169.0, 164.9, 155.6, 141.6, 138.1, 136.4, 133.6, 131.4, 131.21, 131.18, 131.0, 130.9, 130.5, 129.8, 127.0, 125.9, 120.3, 34.8, 30.9. LCMS RT: 2.769 min. LCMS purity 100%. HRMS (ESI)  $m/z$  calcd for  $C_{24}H_{20}Cl_3NO_3$   $[M+H]^+$  476.0581, found 476.0582.



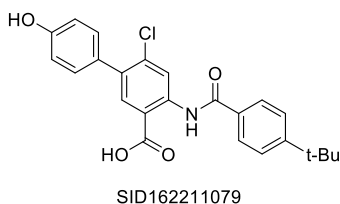

**4-(4-(*t*-butyl)benzamido)-6-chloro-4'-hydroxy-[1,1'-biphenyl]-3-carboxylic acid, SID162211079, entry 16, Table 1.** Prepared according to Scheme 2.

**Methyl 4-amino-6-chloro-4'-hydroxy-[1,1'-biphenyl]-3-carboxylate.** Prepared as described above, **Scheme 2, Step 1.** (4-hydroxyphenyl) boronic acid (0.063 g, 0.46 mmol), methyl 2-amino-5-bromo-4-chlorobenzoate (0.10 g, 0.382 mmol), 1,1'-bis(di-*t*-butylphosphino)ferrocene palladium dichloride, (5.2 mg, 7.6  $\mu$ mol) and  $K_2CO_3$  (0.079 g, 0.57 mmol), degassed acetonitrile (1.5 mL) and water (1.5 mL). The crude product was purified by reverse-phase MPLC (10 - 100%  $CH_3CN$ :water) to provide methyl 4-amino-6-chloro-4'-hydroxy-[1,1'-biphenyl]-3-carboxylate (0.022 g, 0.079 mmol, 21% yield) as a white solid.  $^1H$  NMR (400 MHz,  $CDCl_3$ )  $\delta$  7.82 (s, 1H), 7.28 (d,  $J = 8.5$  Hz, 2H), 6.87 (d,  $J = 8.5$  Hz, 2H), 6.79 (s, 1H), 5.76 (br s, 2H), 4.83 (br s, 1H), 3.86 (s, 3H).

**Methyl 4-(4-(*t*-butyl)benzamido)-6-chloro-4'-hydroxy-[1,1'-biphenyl]-3-carboxylate.** Prepared as described above, **Scheme 2, Step 2.** methyl 4-amino-6-chloro-4'-hydroxy-[1,1'-biphenyl]-3-carboxylate (0.026 g, 0.094 mmol), acetonitrile (4 mL) and 4-(*t*-butyl)benzoyl chloride (0.020 g, 0.019 mL, 0.10 mmol). Purified by MPLC (0 - 25% EtOAc:hexanes) to afford methyl 4-(4-(*t*-butyl)benzamido)-6-chloro-4'-hydroxy-[1,1'-biphenyl]-3-carboxylate (0.036 g, 0.082 mmol, 88% yield).  $^1H$  NMR (400 MHz,  $CDCl_3$ )  $\delta$  12.00 (s, 1H), 9.16 (s, 1H), 8.04 (s, 1H), 8.00 (d,  $J = 8.3$  Hz, 2H), 7.56 (d,  $J = 8.2$  Hz, 2H), 7.34 (d,  $J = 8.3$  Hz, 2H), 6.91 (d,  $J = 8.2$  Hz, 2H), 3.96 (s, 3H), 1.37 (s, 9H).

**4-(4-(*t*-butyl)benzamido)-6-chloro-4'-hydroxy-[1,1'-biphenyl]-3-carboxylic acid.** Prepared as described above, **Scheme 2, Step 3.** methyl 4-(4-(*t*-butyl)benzamido)-6-chloro-4'-hydroxy-[1,1'-biphenyl]-3-carboxylate (0.026 g, 0.059 mmol), THF (1 mL), LiOH (0.011 g, 0.48 mmol) and water (1 mL). Purified by MPLC (0 - 5% MeOH: $CH_2Cl_2$ ) to afford 4-(4-(*t*-butyl)benzamido)-6-chloro-4'-hydroxy-[1,1'-biphenyl]-3-carboxylic acid **SID162211079** (0.009 g, 0.021 mmol, 36% yield).  $^1H$  NMR (400 MHz,  $DMSO-d_6$ )  $\delta$  8.91 (s, 1H), 7.99 (s, 1H), 7.94 (d,  $J = 8.5$  Hz, 2H), 7.61 (d,  $J = 8.5$  Hz, 2H), 7.27 (d,  $J = 8.6$  Hz, 2H), 6.86 (d,  $J = 8.6$  Hz, 2H), 1.33 (s, 9H).  $^{13}C$  NMR (126 MHz,  $DMSO-d_6$ )  $\delta$  168.9, 164.6, 157.0, 155.1, 140.4, 134.9, 133.6, 133.5, 131.7, 130.4, 128.7, 127.0, 125.8, 119.8, 118.1, 115.1, 34.8, 30.9. LCMS RT: 3.758 min. LCMS purity 100%. HRMS (ESI)  $m/z$  calcd for  $C_{24}H_{22}ClNO_4$   $[M+H]^+$  424.1309, found 424.1310.

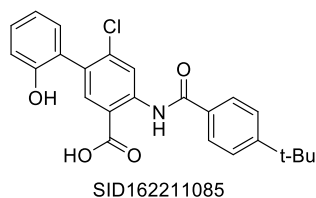

**4-(4-(*t*-butyl)benzamido)-6-chloro-2'-hydroxy-[1,1'-biphenyl]-3-carboxylic acid, SID162211085, entry 17, Table 1.** Prepared according to Scheme 2.

**Methyl 4-amino-6-chloro-2'-hydroxy-[1,1'-biphenyl]-3-carboxylate.** Prepared as described above, Scheme 2, Step 1. (2-hydroxyphenyl) boronic acid (0.066 g, 0.48 mmol), methyl 2-amino-5-bromo-4-chlorobenzoate (0.11 g, 0.40 mmol), 1,1'-bis(di-*t*-butylphosphino)ferrocene palladium dichloride, (5.4 mg, 7.9  $\mu$ mol),  $K_2CO_3$  (0.082 g, 0.59 mmol), degassed acetonitrile (1.5 mL) and water (1.5 mL). The crude product was purified by reverse-phase MPLC (10 - 100% MeCN:water) to provide pure methyl 4-amino-6-chloro-2'-hydroxy-[1,1'-biphenyl]-3-carboxylate (0.045 g, 0.16 mmol, 40% yield).  $^1H$  NMR (400 MHz,  $CDCl_3$ )  $\delta$  7.86 (s, 1H), 7.43 – 7.32 (m, 4H), 6.82 (s, 1H), 3.86 (s, 3H).

**Methyl 4-(4-(*t*-butyl)benzamido)-6-chloro-2'-hydroxy-[1,1'-biphenyl]-3-carboxylate.** Prepared as described above, Scheme 2, Step 2. methyl 4-amino-6-chloro-2'-hydroxy-[1,1'-biphenyl]-3-carboxylate (0.045 g, 0.16 mmol), acetonitrile (2 mL) and 4-(*t*-butyl)benzoyl chloride (0.035 g, 0.032 mL, 0.18 mmol). Purified by MPLC (0 - 15% EtOAc:hexanes) to produce methyl 4-(4-(*t*-butyl)benzamido)-6-chloro-2'-hydroxy-[1,1'-biphenyl]-3-carboxylate (0.063 g, 0.14 mmol, 89% yield).  $^1H$  NMR (400 MHz,  $CDCl_3$ )  $\delta$  12.01 (br s, 1H), 9.15 (s, 1H), 8.06 (s, 1H), 7.96 (d,  $J = 8.5$  Hz, 2H), 7.53 – 7.47 (m, 1H), 7.42 (d,  $J = 8.5$  Hz, 2H), 7.38 – 7.32 (m, 3H), 3.90 (s, 3H), 1.35 (s, 9H).

**4-(4-(*t*-butyl)benzamido)-6-chloro-2'-hydroxy-[1,1'-biphenyl]-3-carboxylic acid.** Prepared as described above, Scheme 2, Step 3. Methyl 4-(4-(*t*-butyl)benzamido)-6-chloro-2'-hydroxy-[1,1'-biphenyl]-3-carboxylate (0.063 g, 0.14 mmol), THF (1 mL), LiOH (0.024 g, 1.0 mmol) and water (1 mL). Concentrated after workup to produce 4-(4-(*t*-butyl)benzamido)-6-chloro-2'-hydroxy-[1,1'-biphenyl]-3-carboxylic acid **SID162211085** (0.033 g, 0.078 mmol, 54% yield) as a white solid.  $^1H$  NMR (400 MHz,  $DMSO-d_6$ )  $\delta$  14.37 (br s, 1H), 9.50 (br s, 1H), 8.87 (s, 1H), 7.99 (br s, 1H), 7.96 (d,  $J = 8.5$  Hz, 2H), 7.59 (d,  $J = 8.5$  Hz, 2H), 7.24 – 7.19 (m, 1H), 7.10 (dd,  $J_1 = 7.5$  Hz,  $J_2 = 1.7$  Hz, 1H), 6.94 (dd,  $J_1 = 8.2$  Hz,  $J_2 = 1.2$  Hz, 1H), 6.86 (td,  $J_1 = 7.4$  Hz,  $J_2 = 1.1$  Hz, 1H), 1.33 (s, 9H).  $^{13}C$  NMR (125 MHz,  $DMSO-d_6$ )  $\delta$  169.0, 164.5, 154.9, 154.7, 140.7, 134.5, 132.0, 131.0, 130.9, 129.0, 127.1, 125.8, 125.7, 118.8, 118.7, 115.5, 34.7, 30.9. LCMS RT: 3.796 min. LCMS purity 97.8%. HRMS (ESI)  $m/z$  calcd for  $C_{24}H_{22}ClNO_4$   $[M+H]^+$  424.1309, found 424.1310.

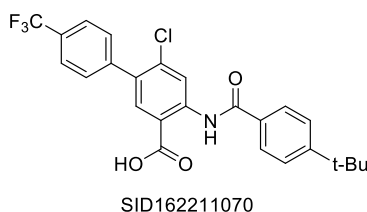

**4-(4-(*t*-butyl)benzamido)-6-chloro-4'-(trifluoromethyl)-[1,1'-biphenyl]-3-carboxylic acid.** **SID162211070, entry 20, Table 1.** Prepared according to Scheme 2.

**Methyl 4-amino-6-chloro-4'-(trifluoromethyl)-[1,1'-biphenyl]-3-carboxylate.** Prepared as described above, Scheme 2, Step 1. (4-(trifluoromethyl)phenyl)boronic acid (0.046 g, 0.24 mmol), methyl 2-amino-5-bromo-4-chlorobenzoate (0.053 g, 0.20 mmol), 1,1'-bis(di-*t*-butylphosphino)ferrocene palladium dichloride (6.5 mg, 10  $\mu$ mol), K<sub>2</sub>CO<sub>3</sub> (0.042 g, 0.30 mmol), degassed acetonitrile (1.5 mL) and water (1.5 mL). The crude product was purified by reverse-phase MPLC (10 - 100% CH<sub>3</sub>CN:water) to afford methyl 4-amino-6-chloro-4'-(trifluoromethyl)-[1,1'-biphenyl]-3-carboxylate (0.033 g, 0.100 mmol, 50% yield) as a white solid. <sup>1</sup>H NMR (400 MHz, CDCl<sub>3</sub>)  $\delta$  7.85 (s, 1H), 7.65 (d, *J* = 7.9 Hz, 2H), 7.52 (d, *J* = 7.9 Hz, 2H), 6.82 (s, 1H), 5.88 (br s, 2H), 3.87 (s, 3H).

**Methyl 4-(4-(*t*-butyl)benzamido)-6-chloro-4'-(trifluoromethyl)-[1,1'-biphenyl]-3-carboxylate.** Prepared as described above, Scheme 2, Step 2. methyl 4-amino-6-chloro-4'-(trifluoromethyl)-[1,1'-biphenyl]-3-carboxylate (0.033 g, 0.10 mmol), acetonitrile (2 mL) and 4-(*t*-butyl)benzoyl chloride (0.022 g, 0.020 mL, 0.11 mmol). Purified by reverse-phase MPLC (10 - 100% CH<sub>3</sub>CN:water) to afford methyl 4-(4-(*t*-butyl)benzamido)-6-chloro-4'-(trifluoromethyl)-[1,1'-biphenyl]-3-carboxylate (0.024 g, 0.048 mmol, 48% yield). <sup>1</sup>H NMR (400 MHz, CDCl<sub>3</sub>)  $\delta$  12.05 (s, 1H), 9.22 (s, 1H), 8.06 (s, 1H), 8.00 (d, *J* = 8.5 Hz, 2H), 7.71 (d, *J* = 8.1 Hz, 2H), 7.59 – 7.55 (m, 4H), 3.97 (s, 3H), 1.37 (s, 9H).

**4-(4-(*t*-butyl)benzamido)-6-chloro-4'-(trifluoromethyl)-[1,1'-biphenyl]-3-carboxylic acid.** Prepared as described above, Scheme 2, Step 3. Methyl 4-(4-(*t*-butyl)benzamido)-6-chloro-4'-(trifluoromethyl)-[1,1'-biphenyl]-3-carboxylate (0.024 g, 0.048 mmol), THF (1 mL), LiOH (8.1 mg, 0.34 mmol) and water (1 mL). Purified by MPLC (0 - 5% MeOH:CH<sub>2</sub>Cl<sub>2</sub>) to produce 4-(4-(*t*-butyl)benzamido)-6-chloro-4'-(trifluoromethyl)-[1,1'-biphenyl]-3-carboxylic acid **SID162211070** (0.012 g, 0.025 mmol, 52% yield). <sup>1</sup>H NMR (400 MHz, DMSO-*d*<sub>6</sub>)  $\delta$  12.28 (s, 1H), 9.01 (s, 1H), 8.06 (s, 1H), 7.92 (d, *J* = 8.5 Hz, 2H), 7.87 (d, *J* = 7.8 Hz, 2H), 7.73 (d, *J* = 7.8 Hz, 2H), 7.64 (d, *J* = 8.5 Hz, 2H), 1.34 (s, 9H). <sup>13</sup>C NMR (126 MHz, DMSO-*d*<sub>6</sub>)  $\delta$  169.1, 164.9, 155.6, 141.6, 141.5, 136.7, 133.6, 132.5, 131.1, 130.2, 128.4 (q, *J* = 25.3 Hz), 127.0, 125.9, 125.3 (q, *J* = 2.8 Hz), 124.3 (q, *J* = 216.4 Hz), 120.4, 115.8, 34.8, 30.9. LCMS RT: 4.405 min. LCMS purity 100%. HRMS (ESI) *m/z* calcd for C<sub>25</sub>H<sub>21</sub>ClF<sub>3</sub>NO<sub>3</sub> [M+H]<sup>+</sup> 476.1234, found 476.1235.

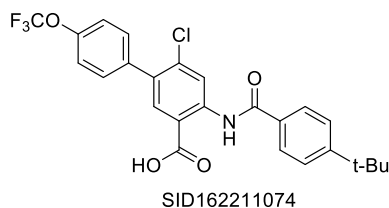

**4-(4-(*t*-butyl)benzamido)-6-chloro-4'-(trifluoromethoxy)-[1,1'-biphenyl]-3-carboxylic acid,** **SID162211074, entry 21, Table 1.** Prepared according to Scheme 2.

**Methyl 4-amino-6-chloro-4'-(trifluoromethoxy)-[1,1'-biphenyl]-3-carboxylate.** Prepared as described above, **Scheme 2, Step 1.** (4-(trifluoromethoxy)phenyl)boronic acid (0.097 g, 0.47 mmol), methyl 2-amino-5-bromo-4-chlorobenzoate (0.10 g, 0.39 mmol), 1,1'-bis (di-*t*-butylphosphino) ferrocene palladium dichloride, (5.4 mg, 7.9  $\mu$ mol), K<sub>2</sub>CO<sub>3</sub> (0.082 g, 0.59 mmol), degassed acetonitrile (1.5 mL) and water (1.5 mL). The crude product was purified by reverse-phase MPLC (10 - 100% CH<sub>3</sub>CN:water) to afford methyl 4-amino-6-chloro-4'-(trifluoromethoxy)-[1,1'-biphenyl]-3-carboxylate (0.053 g, 0.15 mmol, 39% yield). <sup>1</sup>H NMR (400 MHz, CDCl<sub>3</sub>)  $\delta$  7.84 (s, 1H), 7.43 (d, *J* = 8.7 Hz, 2H), 7.26 – 7.23 (m, 2H), 6.84 (s, 1H), 3.87 (s, 3H).

**Methyl 4-(4-(*t*-butyl)benzamido)-6-chloro-4'-(trifluoromethoxy)-[1,1'-biphenyl]-3-carboxylate.** Prepared as described above, **Scheme 2, Step 2.** methyl 4-amino-6-chloro-4'-(trifluoromethoxy)-[1,1'-biphenyl]-3-carboxylate (0.053 g, 0.15 mmol), acetonitrile (2 mL) and 4-(*t*-butyl) benzoyl chloride (0.033 g, 0.031 mL, 0.17 mmol). Purified by MPLC (0 - 15% EtOAc:hexanes) to afford methyl 4-(4-(*t*-butyl)benzamido)-6-chloro-4'-(trifluoromethoxy)-[1,1'-biphenyl]-3-carboxylate (0.049 g, 0.097 mmol, 63% yield). <sup>1</sup>H NMR (400 MHz, CDCl<sub>3</sub>)  $\delta$  12.03 (s, 1H), 9.20 (s, 1H), 8.05 (s, 1H), 8.00 (d, *J* = 8.5 Hz, 2H), 7.57 (d, *J* = 8.5 Hz, 2H), 7.48 (d, *J* = 8.7 Hz, 2H), 7.29 (d, *J* = 8.5 Hz, 2H), 3.97 (s, 3H), 1.37 (s, 9H).

**4-(4-(*t*-butyl)benzamido)-6-chloro-4'-(trifluoromethoxy)-[1,1'-biphenyl]-3-carboxylic acid.** Prepared as described above, **Scheme 2, Step 3.** Methyl 4-(4-(*t*-butyl)benzamido)-6-chloro-4'-(trifluoromethoxy)-[1,1'-biphenyl]-3-carboxylate (0.049 g, 0.097 mmol), THF (1 mL), LiOH (0.016 g, 0.68 mmol) and water (1 mL). Purified by MPLC (0 - 5% MeOH:CH<sub>2</sub>Cl<sub>2</sub>) to afford 4-(4-(*t*-butyl)benzamido)-6-chloro-4'-(trifluoromethoxy)-[1,1'-biphenyl]-3-carboxylic acid **SID162211074** (0.036 g, 0.073 mmol, 76% yield). <sup>1</sup>H NMR (400 MHz, DMSO-*d*<sub>6</sub>)  $\delta$  12.27 (s, 1H), 8.99 (s, 1H), 8.04 (s, 1H), 7.91 (d, *J* = 8.5 Hz, 2H), 7.66 – 7.61 (m, 4H), 7.49 (d, *J* = 8.5 Hz, 2H), 1.34 (s, 9H). <sup>13</sup>C NMR (125 MHz, DMSO-*d*<sub>6</sub>)  $\delta$  169.1, 164.9, 155.6, 148.0, 141.3, 136.8, 136.7, 133.6, 132.5, 131.4, 131.2, 127.0, 126.0, 120.9, 120.4, 120.1 (q, *J* = 256.6 Hz), 115.8, 34.8, 30.9. LCMS RT: 4.519 min. LCMS purity 100%. HRMS (ESI) *m/z* calcd for C<sub>25</sub>H<sub>21</sub>ClF<sub>3</sub>NO<sub>4</sub> [M+H]<sup>+</sup> 492.1183, found 492.1184.

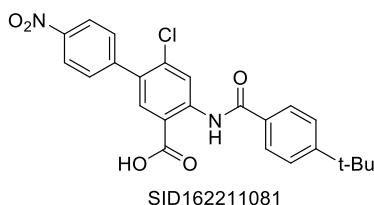

**4-(4-(*t*-butyl)benzamido)-6-chloro-4'-nitro-[1,1'-biphenyl]-3-carboxylic acid, SID162211081, entry 22, Table 1.** Prepared according to Scheme 2.

**Methyl 4-amino-6-chloro-4'-nitro-[1,1'-biphenyl]-3-carboxylate.** Prepared as described above, **Scheme 2, Step 1.** (4-nitrophenyl)boronic acid (0.15 g, 0.87 mmol), methyl 2-amino-5-bromo-4-chlorobenzoate (0.19 g, 0.72 mmol), 1,1'-bis(di-*t*-butylphosphino)ferrocene palladium dichloride, (9.8 mg, 0.014 mmol), K<sub>2</sub>CO<sub>3</sub> (0.150 g, 1.08 mmol), degassed acetonitrile (1.5 mL) and water (1.5 mL). The crude product was purified by reverse-phase MPLC (10 - 100% CH<sub>3</sub>CN:water) to provide pure methyl 4-amino-6-chloro-4'-

nitro-[1,1'-biphenyl]-3-carboxylate (0.15 g, 0.50 mmol, 68% yield) as an off-white solid.  $^1\text{H}$  NMR (400 MHz,  $\text{CDCl}_3$ )  $\delta$  8.26 (d,  $J$  = 8.9 Hz, 2H), 7.87 (s, 1H), 7.59 (d,  $J$  = 8.9 Hz, 2H), 6.84 (s, 1H), 3.88 (s, 3H).

**Methyl 4-(4-(*t*-butyl)benzamido)-6-chloro-4'-nitro-[1,1'-biphenyl]-3-carboxylate.** Prepared as described above, Scheme 2, Step 2. methyl 4-amino-6-chloro-4'-nitro-[1,1'-biphenyl]-3-carboxylate (0.15 g, 0.50 mmol), acetonitrile (3 mL) and 4-(*t*-butyl)benzoyl chloride (0.11 g, 0.099 mL, 0.55 mmol). Purified by MPLC (0 - 15% EtOAc:hexanes) to afford methyl 4-(4-(*t*-butyl)benzamido)-6-chloro-4'-nitro-[1,1'-biphenyl]-3-carboxylate (0.20 g, 0.43 mmol, 87% yield).  $^1\text{H}$  NMR (400 MHz,  $\text{CDCl}_3$ )  $\delta$  12.07 (br s, 1H), 9.25 (s, 1H), 8.32 (d,  $J$  = 8.8 Hz, 2H), 8.08 (s, 1H), 8.01 (d,  $J$  = 8.6 Hz, 2H), 7.64 (d,  $J$  = 8.8 Hz, 2H), 7.58 (d,  $J$  = 8.6 Hz, 2H), 3.99 (s, 3H), 1.38 (s, 9H).

**4-(4-(*t*-butyl)benzamido)-6-chloro-4'-nitro-[1,1'-biphenyl]-3-carboxylic acid.** Prepared as described above, Scheme 2, Step 3. Methyl 4-(4-(*t*-butyl)benzamido)-6-chloro-4'-nitro-[1,1'-biphenyl]-3-carboxylate (0.027 g, 0.058 mmol), THF (1 mL), LiOH (9.7 mg, 0.41 mmol) and water (1 mL) Purified by MPLC (0 - 5% MeOH: $\text{CH}_2\text{Cl}_2$ ) to afford 4-(4-(*t*-butyl)benzamido)-6-chloro-4'-nitro-[1,1'-biphenyl]-3-carboxylic acid **SID162211081** (0.016 g, 0.035 mmol, 61% yield).  $^1\text{H}$  NMR (400 MHz,  $\text{DMSO}-d_6$ )  $\delta$  12.43 (s, 1H), 9.02 (s, 1H), 8.34 (d,  $J$  = 8.8 Hz, 2H), 8.08 (s, 1H), 7.92 (d,  $J$  = 8.5 Hz, 2H), 7.80 (d,  $J$  = 8.7 Hz, 2H), 7.64 (d,  $J$  = 8.5 Hz, 2H), 1.34 (s, 9H).  $^{13}\text{C}$  NMR (126 MHz,  $\text{DMSO}-d_6$ )  $\delta$  169.0, 164.9, 155.6, 147.0, 144.1, 141.8, 136.4, 133.6, 131.8, 131.1, 130.8, 127.0, 125.9, 123.5, 120.5, 116.2, 34.8, 30.9. LCMS RT: 4.226 min. LCMS purity 100%. HRMS (ESI)  $m/z$  calcd for  $\text{C}_{24}\text{H}_{21}\text{ClN}_2\text{O}_5$   $[\text{M}+\text{H}]^+$  453.1211, found 453.1212.

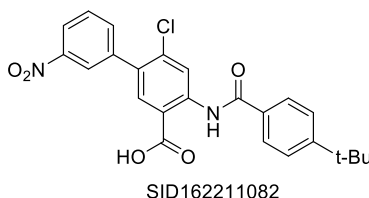

**4-(4-(*t*-butyl)benzamido)-6-chloro-3'-nitro-[1,1'-biphenyl]-3-carboxylic acid, SID162211082, entry 23, Table 1.** Prepared according to Scheme 2.

**Methyl 4-amino-6-chloro-3'-nitro-[1,1'-biphenyl]-3-carboxylate.** Prepared as described above, Scheme 2, Step 1. (3-nitrophenyl)boronic acid (0.15 g, 0.89 mmol), methyl 2-amino-5-bromo-4-chlorobenzoate (0.20 g, 0.74 mmol), 1,1'-bis (di-*t*-butylphosphino)ferrocene palladium dichloride, (10 mg, 0.015 mmol),  $\text{K}_2\text{CO}_3$  (0.15 g, 1.08 mmol), degassed acetonitrile (1.5 mL) and water (1.5 mL). The crude product was purified by reverse-phase MPLC (10 - 100%  $\text{CH}_3\text{CN}$ :water) to provide pure methyl 4-amino-6-chloro-3'-nitro-[1,1'-biphenyl]-3-carboxylate (0.17 g, 0.55 mmol, 74% yield).  $^1\text{H}$  NMR (400 MHz,  $\text{CDCl}_3$ )  $\delta$  8.29 (t,  $J$  = 2.0 Hz, 1H), 8.22 - 8.18 (m, 1H), 7.87 (s, 1H), 7.75 - 7.45 (m, 1H), 7.57 (t,  $J$  = 8.2 Hz, 1H), 6.85 (s, 1H), 3.88 (s, 3H).

**Methyl 4-(4-(*t*-butyl)benzamido)-6-chloro-3'-nitro-[1,1'-biphenyl]-3-carboxylate.** Prepared as described above, Scheme 2, Step 2. methyl 4-amino-6-chloro-3'-nitro-[1,1'-biphenyl]-3-carboxylate (0.16 g, 0.52 mmol), acetonitrile (5 mL) and 4-(*t*-butyl)benzoyl chloride (0.11 g, 0.10 mL, 0.57 mmol). Purified by MPLC (0 - 15% EtOAc:hexanes) to afford methyl 4-(4-(*t*-butyl)benzamido)-6-chloro-3'-nitro-[1,1'-

biphenyl]-3-carboxylate (0.22 g, 0.46 mmol, 89% yield). <sup>1</sup>H NMR (400 MHz, CDCl<sub>3</sub>) δ 12.07 (s, 1H), 9.25 (s, 1H), 8.33 (t, *J* = 2.0 Hz, 1H), 8.29 – 8.25 (m, 1H), 8.09 (s, 1H), 8.00 (d, *J* = 8.5 Hz, 2H), 7.84 – 7.81 (m, 1H), 7.63 (t, *J* = 8.0 Hz, 1H), 7.57 (d, *J* = 8.6 Hz, 2H), 3.99 (s, 3H), 1.38 (s, 9H).

**4-(4-(*t*-butyl)benzamido)-6-chloro-3'-nitro-[1,1'-biphenyl]-3-carboxylic acid.** Prepared as described above, **Scheme 2, Step 3**. Methyl 4-(4-(*t*-butyl)benzamido)-6-chloro-3'-nitro-[1,1'-biphenyl]-3-carboxylate (0.026 g, 0.055 mmol), THF (1 mL), LiOH (9.2 mg, 0.38 mmol) and water (1 mL). Purified by reverse phase MPLC (10 - 100% CH<sub>3</sub>CN:water) to afford 4-(4-(*t*-butyl)benzamido)-6-chloro-3'-nitro-[1,1'-biphenyl]-3-carboxylic acid **SID162211082** (0.015 g, 0.033 mmol, 60% yield). <sup>1</sup>H NMR (400 MHz, DMSO-*d*<sub>6</sub>) δ 12.78 (br s, 1H), 9.01 (s, 1H), 8.33 – 8.29 (m, 2H), 8.11 (s, 1H), 8.00 – 7.96 (m, 1H), 7.93 (d, *J* = 8.5 Hz, 2H), 7.83 – 7.78 (m, 1H), 7.64 (d, *J* = 8.5 Hz, 2H), 1.34 (s, 9H). <sup>13</sup>C NMR (125 MHz, DMSO-*d*<sub>6</sub>) δ 168.9, 164.9, 155.6, 147.7, 141.7, 139.1, 136.11, 136.07, 133.8, 131.4, 131.3, 130.1, 127.1, 125.9, 124.0, 122.9, 120.3, 34.8, 30.9. LCMS RT: 4.134 min. LCMS purity 95.2%. HRMS (ESI) *m/z* calcd for C<sub>24</sub>H<sub>21</sub>ClN<sub>2</sub>O<sub>5</sub> [M+H]<sup>+</sup> 453.1211, found 453.1212.

## References

<sup>1</sup>Sharlow, E.; Golden, J.E.; Dodson, H.; Morris, M.; Hesser, M.; Lyda, T.; Leimgruber, S.; Schroeder, C.E.; Flaherty, D.P.; Weiner, W.S.; Simpson, D.; Lazo, J.S.; Aubé, J.; **Morris, J.C.** in *Probe Reports from the NIH Molecular Libraries Program* [Internet] (Ed.:National Center for Biotechnology Information (US)), NCBI, US National Library of Medicine, Bethesda, MD, **2010**, <http://www.ncbi.nlm.nih.gov/books/NBK63599/>.

<sup>2</sup>Flaherty, D.P.; Harris, M.T.; Schroeder, C.E.; Khan, H.; Kahney, E.; Hackler, A.; Patrick, S.; Weiner, W.S.; Aube, J.; Morris, J.C.; **Golden, J.E.** Optimization and evaluation of antiparasitic benzamidobenzoic acids as inhibitors of kinetoplastid hexokinase 1. *ChemMedChem*. **2017**, 12 (23),1994-2005. DOI: 10.1002/cmdc.201700592.

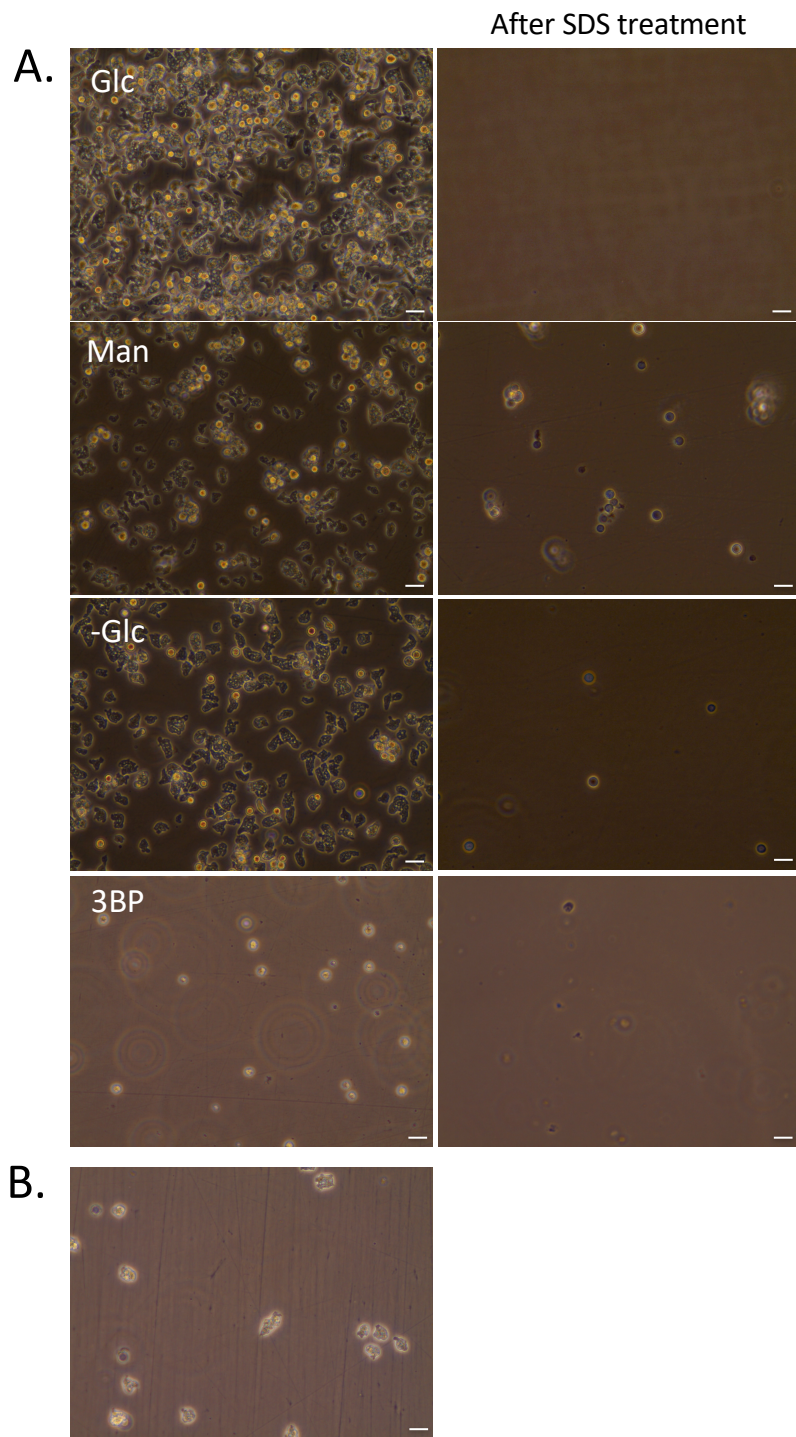





|              |     |                                                                   |     |
|--------------|-----|-------------------------------------------------------------------|-----|
| 3VEY_HsGCK   | 385 | ESRSEDVMRI--TVGVDSVYKLHPS-FKER--F---HASVRRLT-----PSCEITFIE---SE   | 432 |
| 3O8M_KlHK    | 408 | -----YKTA--HIAADGSVFNRYPG-YKEK--A---AQALKDIYNWDVEKMEDHPIQLVA---AE | 456 |
| 3B8A_ScHK_P1 | 409 | -----YKTG--HIAADGSVYNKYPG-FKEA--A---AKGLRDIYGWTG-DASKDPITIVP---AE | 456 |
| 2Q2R_TcGlcK  | 305 | -----PL--TIVLVGDNIVNNAFFYRNPQNLKEMHHEALNHEMERF-G-FQSRVSYLRQKLL    | 358 |
| 6DA0_NfGlcK  | 339 | -----PTCRGVFFAGDNQVFNEDEFFKEH--LSILQKELFQTHQK--H-WLTDLKPYRQMKEY   | 391 |

|      |     |          |   |     |
|------|-----|----------|---|-----|
| cons | 463 | : *. ::: | : | 528 |
|------|-----|----------|---|-----|

|              |     |                                                                     |     |
|--------------|-----|---------------------------------------------------------------------|-----|
| 3VEY_HsGCK   | 433 | EGSGRGAAL-----VSAVACKKACMLGQ-----                                   | 455 |
| 3O8M_KlHK    | 457 | DGSGVGAAI-----IACLTQKRLA---AGKSVGI                                  | 482 |
| 3B8A_ScHK_P1 | 457 | DGSGAGAAV-----IAALSEKRIA---EGKSLGI                                  | 482 |
| 2Q2R_TcGlcK  | 359 | NLNLMGCYRCGLDLS-----                                                | 373 |
| 6DA0_NfGlcK  | 392 | NFNVKGCLQKARELAQLGSTTMVDEKPKAGLKDVLVSAIPTAFFSVLSFFFTAKNLY---EK----- | 449 |

|      |     |        |  |     |
|------|-----|--------|--|-----|
| cons | 529 | : . *. |  | 594 |
|------|-----|--------|--|-----|

|              |     |     |     |
|--------------|-----|-----|-----|
| 3VEY_HsGCK   | 456 | --- | 455 |
| 3O8M_KlHK    | 483 | KGE | 485 |
| 3B8A_ScHK_P1 | 483 | IGA | 485 |
| 2Q2R_TcGlcK  | 374 | --- | 373 |
| 6DA0_NfGlcK  | 450 | --- | 449 |

|      |     |  |     |
|------|-----|--|-----|
| cons | 595 |  | 597 |
|------|-----|--|-----|
